# Supplementary material for: Global environmental changes more frequently offset than intensify detrimental effects of biological invasions
Source: PubMed Central journal article supplement — Proc Natl Acad Sci U S A. 2022 May 27;119(22):e2117389119. doi: 10.1073/pnas.2117389119 (PMC9295750; doi:10.1073/pnas.2117389119), 2022-05-27
Supplement: pnas.2117389119.sapp.pdf [file pnas.2117389119.sapp.pdf]

1 **Supplementary Information**

2 *Contents:*

3 **Appendix part 1:** Supplementary methods (Supplementary text, references, figures, and tables)

4 **Appendix part 2:** Supplementary results (Supplementary figures)

5

6 **Appendix part 1: Supplementary methods**

7 **Supplementary Information Text**

8 **Literature search**

9 On 11 November 2015, 26 February 2019, and 30 September 2020, we conducted literature searches in  
10 the ISI Web of Knowledge database for papers that investigated the interaction of the effects of invasive  
11 species and one of the following global environmental change (GEC) stressors: warming; nitrogen  
12 deposition; O<sub>2</sub> depletion; drought; CO<sub>2</sub> addition; and altered pH. We searched the Web of Science Core  
13 Collection for articles and reviews that were available in English through September 30, 2020. All  
14 searches used the following search string: “TS=((Invasi\* OR invader\* OR exotic\* OR alien\* OR non-  
15 native\* OR nonnative\* OR non-indigenous OR nonindigenous OR naturalized OR introduc\*) AND  
16 (Impact\* OR effect\*) AND (Experim\* OR manipula\*)”, and an additional search string to describe each  
17 GEC type. See **Table S1.1** for full search terms for individual GECs.

18 We filtered results to twelve ecologically relevant categories (Biodiversity Conservation, Ecology,  
19 Entomology, Environmental Sciences, Fisheries, Forestry, Limnology, Marine Freshwater Biology,  
20 Oceanography, Plant Sciences, Soil Science, and Zoology) and restricted publication date to 2020 or  
21 earlier. Our searches returned 6,192 studies in total.

22 We had three main design criteria for including a study in our subsequent analyses. The study  
23 had to: (1) test the effect of both invasive species and at least one of the GEC stressors; (2) include  
24 experimental manipulation of both factors (invasion and GEC, hereafter “INV&GEC”) or experimentally  
25 manipulate one factor across a gradient of the other (e.g., an invasive species removal experiment across  
26 an elevation gradient as a proxy for a temperature gradient); and (3) measure the direct effect of both  
27 experimental manipulations on native species or ecosystems. Each study was reviewed independently by  
28 one of the contributing authors. See **Fig. S1.1** for diagram showing steps of filtering studies for inclusion.  
29 We included 95 total studies in our meta-analysis; references for these studies are included here (1-95).

30 **Data categorization**

31 Data from each study were extracted by a single author. That person recorded data on the taxonomy of  
32 the invasive species used in the study, the type and magnitude of the GEC manipulation, the setting  
33 (ecosystem type, continent, type of experimental setup), and the type of measured response (see **Table**  
34 **S1.2** for categories and definitions), in addition to the means, variances, and sample sizes of the  
35 experimental treatments. Two of the recorded factors were somewhat subjective: the invasion mechanism  
36 (i.e., how the invasive species is thought to influence the measured response) and the “response benefit”  
37 (i.e., whether a higher value of the measured response aligns with a benefit to the native species,  
38 community, or ecosystem). We referred to the language used by the authors of each study to infer the  
39 hypothesized invasion mechanism and whether the response was considered beneficial or detrimental to  
40 the system, but this required some subjective interpretation and, in some cases, our own expert  
41 knowledge. Thus, we included additional fields in the coded data on the certainty associated with each of  
42 these data (“yes” or “no”). The corresponding author confirmed the invasion mechanisms and response  
43 benefits for all cases where the original coder had recorded uncertainty in their determination. As a kind

## Supplementary Information

44 of sensitivity analysis to this effect, we also reran analyses without data where the response benefit was  
45 uncertain.

### 46 Data analysis

#### 47 Effect size calculation

48 In order to compare treatment effects across cases, we computed Hedges'  $d$  effect sizes. Hedges'  $d$  is  
49 an estimate of the standardized mean difference of treatment from baseline and is not biased by small  
50 sample size (96). We calculated the effect size ( $d$ ) as:

$$51 \quad d = \frac{X_T - X_B}{S} J \quad (\text{Eq. 1})$$

52 where  $X_T$  is the observed treatment mean response,  $X_B$  is the observed baseline mean response,  $S$  is the  
53 pooled standard deviation, and  $J$  is a weighting factor based on the number of replicates (96, 97).  $S$  is  
54 calculated as:

$$55 \quad S = \sqrt{\frac{(n_T - 1)\sigma_T^2 + (n_B - 1)\sigma_B^2}{n_T + n_B - 1}} \quad (\text{Eq. 2})$$

56 and  $J$  is calculated as:

$$57 \quad J = 1 - \frac{3}{4(n_T + n_B - 2) - 1} \quad (\text{Eq. 3})$$

58 where  $n_T$  is the number of replicates in the treatment,  $n_B$  is the number of replicates in the baseline,  $\sigma_T^2$  is  
59 the treatment standard deviation, and  $\sigma_B^2$  is the control standard deviation (96). All cases included  
60 information on the standard error, standard deviation, or confidence interval around the mean, which we  
61 converted to standard deviation.

62 The variance around  $d$  was calculated as:

$$63 \quad \text{var}_d = \left(1 - \frac{3}{4(n_T + n_B - 2) - 1}\right)^2 \times \left(\frac{n_T + n_B - 2}{\frac{n_T \times n_B}{n_T + n_B} (n_T + n_B - 4)}\right) \quad (\text{Eq. 4})$$

64 This variance calculation reduces bias in the precision, since it is independent of the magnitude of  $d$  (98,  
65 99).

66 The baseline ( $X_B$ ) for single stressor treatments (invasion or GEC) was the observed control  
67 response ( $X_C$ ). To determine whether observed INV&GEC effects differed from that expected from  
68 combining the two single stressors (i.e., to identify whether the interactions between invasion and GEC  
69 were additive, antagonistic, or synergistic), we calculated a predicted additive effect by combining the  
70 results of the individual stressor treatments:

$$71 \quad X_p = (X_I - X_C) + (X_{GC} - X_C) + X_C \quad (\text{Eq. 5})$$

72 where  $X_p$  is the predicted additive response to interaction treatment,  $X_I$  is the observed mean response to  
73 invasion treatment,  $X_{GC}$  is the observed mean response to global environmental change treatment, and  
74  $X_C$  is the mean observed control response (100). Where  $n_B$  was specified in Eq. 2 and 3, we used  $(n_I +$   
75  $n_{GC})$  to represent the sample size of the predicted additive response (100). There were 49 cases where  
76  $X_p$  was impossibly negative (e.g., a negative value of biomass, survival, or abundance); we replaced  
77 these with zeros before calculating the predicted additive Hedges'  $d$ .

78 We examined the data for outliers prior to performing meta-analyses. Eight cases had recorded  
79 standard deviations of zero for at least one treatment effect, which produced NA's or infinite Hedges'  $d$   
80 values. After removing these cases, we visually examined the distribution of Hedges'  $d$  values and  
81 removed one case with a Hedges'  $d$  of over -200, a much higher magnitude than other cases (**Fig.**

82 **S1.2A**). We thus analyzed 458 cases from 95 studies, compared to 467 cases from 95 studies in the  
83 original dataset.

84 To test whether the inclusion of other potential outliers affected the results, we compared the  
85 results comparing mean effect sizes and treatment effects (Fig. 2 in main text) with a dataset with  
86 additional potential outliers removed. We chose to remove an additional 8 cases from this comparison  
87 dataset with Hedges'  $d$ 's with absolute values of 30 or higher, based on z-scores (**Table S1.3**) and visual  
88 assessment (**Fig. S1.2B**).

#### 89 *Regression analysis*

90 We fit three types of regression models:

- 91 1) A model with treatment as the only predictor, to compare the overall mean effect sizes of the  
92 three treatments (**Fig. 2**, main text)
- 93 2) Five models (one for each predictor: GEC; invasion mechanism; response class; ecosystem  
94 setting; or experiment type) with the predictor and treatment, to compare mean treatment  
95 effects across categories of the predictor (**Fig. 3A** and **Fig. 4A**, main text, and **Fig. S2.8**,  
96 Appendix part 2)
- 97 3) Three models, one for each treatment, comparing the effects of all predictors (GEC, invasion  
98 mechanism, response class, ecosystem setting, and experiment type) for that treatment (**Fig.**  
99 **S2.7**, Appendix part 2)

100

101 Each model included a random effect for the study identity and treated the calculated effect size  
102 ( $d$ ) as distributed normally around a true effect size with variance equal to the calculated variance around  
103  $d$ . Models that included data on all three treatments (not including the third type described above) also  
104 included a random effect for the case identity. All estimated model parameters were given uninformative  
105 priors (dnorm(0, 1/10000); dunif(0,100) for standard deviations). Models were run for 50,000 iterations,  
106 with 30,000 for adapting and 1,000 for burn-in. We used the Gelman-Rubin's statistic (101) to check for  
107 model convergence; all models converged with a Gelman-Rubin's statistic of  $\leq 1.01$ . We also calculated  
108 Bayesian p-values comparing: (a) sums of squares differences from the mean; and (b) mean values of  
109 observed and simulated data. Bayesian p-values were close to 0.5 for all models, suggesting adequate  
110 model fit.

111 Estimates of mean Hedges'  $d$  values depend on the sign (positive or negative) of the treatment  
112 effects; thus, we treated the signs of effects as normative (i.e., either beneficial or detrimental to the  
113 native species, community, or ecosystem) to make the sign more consistently meaningful. This required  
114 some subjectivity in assigning a benefit or detriment classification to measured responses (see above,  
115 "Data categorization"). We therefore re-analyzed data in regressions after removing cases with a less  
116 certain benefit/detriment distinction, to determine how these cases affected the results. We removed 148  
117 cases where the coding authors reported uncertainty in the benefit/detriment assignment, including all  
118 cases with responses classified as nutrients, allocation, or behavior. The resulting dataset comprised 310  
119 cases from 78 studies measuring effects on abundance, biomass, diversity, physiology, reproduction,  
120 size, or survival.

#### 121 *Fisher's tests*

122 We used Fisher's tests to examine differences in the types of INV&GEC interactions across categories of  
123 predictors (GEC, invasion mechanism, response class, ecosystem setting, and experiment type).  
124 However, these tests do not account for potential pseudo-replication between multiple cases from the  
125 same study. Thus, we also performed Fisher's tests on a reduced dataset of one case per study. We  
126 randomly selected one case per study (i.e., the first case listed in the dataset for each study) after  
127 ordering data with the least frequent response classes first, to retain some data for each category of  
128 measured response.

129 *Publication bias*

130 We used funnel plots and Spearman's rank correlation tests to look for publication bias in the dataset,  
 131 comparing the Hedges' *d* scores for invasion, GEC, and INV&GEC treatments to the precision in Hedges'  
 132 *d* estimates and pooled sample sizes (100, 102). We also examined the relationship between precision  
 133 and sample sizes and the residuals of the intercept mixed effect model, which accounted for some of the  
 134 variation in Hedges' *d* scores across studies (102) (**Fig. S2.3**, Appendix part 2).

135

136

137

138 **References**

- 139 1. G. Ceccherelli, F. Cinelli, Short-term effects of nutrient enrichment of the sediment and interactions  
 140 between the seagrass *Cymodocea nodosa* and the introduced green alga *Caulerpa taxifolia* in a  
 141 Mediterranean bay. *J. Exp. Mar. Biol. Ecol.* **217**, 165–177 (1997).
- 142 2. D. Nernberg, M. R. Dale, Competition of five native prairie grasses with *Bromus inermis* under three  
 143 moisture regimes. *Can. J. Bot.* **75**, 2140–2145 (1997).
- 144 3. D. A. Holway, A. V. Suarez, T. J. Case, Role of abiotic factors in governing susceptibility to  
 145 invasion: a test with Argentine ants. *Ecology* **83**, 1610–1619 (2002).
- 146 4. W. B. Badgery, D. R. Kemp, D. L. Michalk, W. M. King, Competition for nitrogen between Australian  
 147 native grasses and the introduced weed *Nassella trichotoma*. *Ann. Bot.* **96**, 799–809 (2005).
- 148 5. M. A. Bradford, *et al.*, Impacts of invasive plant species on riparian plant assemblages: Interactions  
 149 with elevated atmospheric carbon dioxide and nitrogen deposition. *Oecologia* **152**, 791–803 (2007).
- 150 6. H. Garcia-Serrano, F. X. Sans, J. Escarre, Interspecific competition between alien and native  
 151 congeneric species. *Acta Oecol.* **31**, 69–78 (2007).
- 152 7. A. Sala, D. Verdaguer, M. Vilà, Sensitivity of the invasive geophyte *Oxalis pes-caprae* to nutrient  
 153 availability and competition. *Ann. Bot.* **99**, 637–645 (2007).
- 154 8. F. R. Krasso, K. R. Brown, M. J. Bishop, B. P. Kelaher, S. Summerhayes, Condition-specific  
 155 competition allows coexistence of competitively superior exotic oysters with native oysters. *J. Anim.*  
 156 *Ecol.* **77**, 5–15 (2008).
- 157 9. S. Matesanz, A. Escudero, F. Valladares, Additive effects of a potentially invasive grass and water  
 158 stress on the performance of seedlings of gypsum specialists. *Appl. Veg. Sci.* **11**, 287–296 (2008).
- 159 10. E. Priddis, R. Rader, M. Belk, B. Schaalje, S. Merkle, Can separation along the temperature niche  
 160 axis promote coexistence between native and invasive species? *Divers. Distrib.* **15**, 682–691  
 161 (2009).
- 162 11. A. J. Tanentzap, D. R. Bazely, Propagule pressure and resource availability determine plant  
 163 community invasibility in a temperate forest understorey. *Oikos* **118**, 300–308 (2009).
- 164 12. J. Martínez-Lüscher, M. Holmer, Potential effects of the invasive species *Gracilaria vermiculophylla*  
 165 on *Zostera marina* metabolism and survival. *Mar. Environ. Res.* **69**, 345–349 (2010).
- 166 13. C. Werner, U. Zumkier, W. Beyschlag, C. Máguas, High competitiveness of a resource demanding  
 167 invasive acacia under low resource supply. *Plant Ecol.* **206**, 83–96 (2010).
- 168 14. H. Höffle, M. S. Thomsen, M. Holmer, High mortality of *Zostera marina* under high temperature  
 169 regimes but minor effects of the invasive macroalgae *Gracilaria vermiculophylla*. *Estuar. Coast.*  
 170 *Shelf Sci.* **92**, 35–46 (2011).
- 171 15. W. Ding, R. Wang, Y. Yuan, X. Liang, J. Liu, Effects of nitrogen deposition on growth and  
 172 relationship of *Robinia pseudoacacia* and *Quercus acutissima* seedlings. *Dendrobiology* **67** (2012).
- 173 16. N. Eisenhauer, N. A. Fisichelli, L. E. Frelich, P. B. Reich, Interactive effects of global warming and  
 174 'global warming' on the initial establishment of native and exotic herbaceous plant species. *Oikos*  
 175 **121**, 1121–1133 (2012).

- 176 17. H. Höffle, T. Wernberg, M. S. Thomsen, M. Holmer, Drift algae, an invasive snail and elevated  
177 temperature reduce ecological performance of a warm-temperate seagrass, through additive  
178 effects. *Mar. Ecol. Prog. Ser.* **450**, 67–80 (2012).
- 179 18. G. R. Smith, C. J. Dibble, Effects of an invasive fish (*Gambusia affinis*) and anthropogenic nutrient  
180 enrichment on American toad (*Anaxyrus americanus*) tadpoles. *J. Herpetol.* **46**, 198–202 (2012).
- 181 19. K. G. Lyons, B. G. Maldonado-Leal, G. Owen, Community and ecosystem effects of buffelgrass  
182 (*Pennisetum ciliare*) and nitrogen deposition in the Sonoran Desert. *Inv. Plant Sci. Manag.* **6**, 65–78  
183 (2013).
- 184 20. C. Olabarria, *et al.*, Response of macroalgal assemblages from rockpools to climate change:  
185 Effects of persistent increase in temperature and CO<sub>2</sub>. *Oikos* **122**, 1065–1079 (2013).
- 186 21. N. Rana, *et al.*, Impact of soil pH on bahiagrass competition with giant smutgrass (*Sporobolus*  
187 *indicus var. pyramidalis*) and small smutgrass (*Sporobolus indicus var. indicus*). *Weed Sci.* **61**,  
188 109–116 (2013).
- 189 22. M. Verliinden, A. Van Kerkhove, I. Nijs, Effects of experimental climate warming and associated soil  
190 drought on the competition between three highly invasive West European alien plant species and  
191 native counterparts. *Plant Ecol.* **214**, 243–254 (2013).
- 192 23. Y. Yuan, *et al.*, Competitive interaction between the exotic plant *Rhus typhina* L. and the native tree  
193 *Quercus acutissima* Carr. in Northern China under different soil N: P ratios. *Plant Soil* **372**, 389–400  
194 (2013).
- 195 24. Y. Zhang, L. Wang, X. Xie, L. Huang, Y. Wu, Effects of invasion of *Spartina alterniflora* and  
196 exogenous N deposition on N<sub>2</sub>O emissions in a coastal salt marsh. *Ecol. Eng.* **58**, 77–83 (2013).
- 197 25. J. Franzese, L. Ghermandi, Early competition between the exotic herb *Rumex acetosella* and two  
198 native tussock grasses with different palatability and water stress tolerance. *J. Arid Environ.* **106**,  
199 58–62 (2014).
- 200 26. B. Gooden, K. French, Impacts of alien plant invasion on native plant communities are mediated by  
201 functional identity of resident species, not resource availability. *Oikos* **124**, 298–306 (2015).
- 202 27. B. G. Hammock, M. L. Johnson, Trout reverse the effect of water temperature on the foraging of a  
203 mayfly. *Oecologia* **175**, 997–1003 (2014).
- 204 28. Y. Luo, *et al.*, Increased nitrogen deposition alleviated the competitive effects of the introduced  
205 invasive plant *Robinia pseudoacacia* on the native tree *Quercus acutissima*. *Plant Soil* **385**, 63–75  
206 (2014).
- 207 29. P. Wright, M. A. Cregger, L. Souza, N. J. Sanders, A. T. Classen, The effects of insects, nutrients,  
208 and plant invasion on community structure and function above-and belowground. *Ecol. Evol.* **4**,  
209 732–742 (2014).
- 210 30. X. Mou, X. Liu, C. Tong, Z. Sun, Responses of CH<sub>4</sub> emissions to nitrogen addition and *Spartina*  
211 *alterniflora* invasion in Minjiang River estuary, southeast of China. *Chin. Geogr. Sci.* **24**, 562–574  
212 (2014).
- 213 31. F. Correa-Araneda, *et al.*, Joint effects of climate warming and exotic litter (*Eucalyptus globulus*  
214 Labill.) on stream detritivore fitness and litter breakdown. *Aquat. Sci.* **77**, 197–205 (2015).
- 215 32. C. W. Datri, C. L. Pray, Y. Zhang, W. H. Nowlin, Nutrient enrichment scarcely affects ecosystem  
216 impacts of a non-native herbivore in a spring-fed river. *Freshw. Biol.* **60**, 551–562 (2015).
- 217 33. M. A. Goedknegt, J. E. Welsh, J. Drent, D. W. Thieltses, Climate change and parasite transmission:  
218 How temperature affects parasite infectivity via predation on infective stages. *Ecosphere* **6**, 1–9  
219 (2015).
- 220 34. C. Lavery, J. T. Dick, M. E. Alexander, F. E. Lucy, Differential ecological impacts of invader and  
221 native predatory freshwater amphipods under environmental change are revealed by comparative  
222 functional responses. *Biol. Invasions* **17**, 1761–1770 (2015).
- 223 35. X. Lu, *et al.*, Climate warming increases biological control agent impact on a non-target species.  
224 *Ecol. Lett.* **18**, 48–56 (2015).
- 225 36. P. Sardiña, J. Beringer, D. Roche, R. M. Thompson, Temperature influences species interactions  
226 between a native and a globally invasive freshwater snail. *Freshw. Sci.* **34**, 933–941 (2015).

- 227 37. S. Tannas, D. B. Hewins, E. W. Bork, Isolating the role of soil resources, defoliation, and  
228 interspecific competition on early establishment of the late successional bunchgrass *Festuca*  
229 *campestris*. *Restor. Ecol.* **23**, 366–374 (2015).
- 230 38. F.-J. Zhang, F.-X. Chen, Q. Li, H.-Y. Xu, Y.-Y. Jia, Effects of nitrogen addition on the competition  
231 between the invasive species *Flaveria bidentis* and two native species. *Russ. J. Ecol.* **46**, 325–331  
232 (2015).
- 233 39. I. Gestoso, F. Arenas, C. Olabarria, Ecological interactions modulate responses of two intertidal  
234 mussel species to changes in temperature and pH. *J. Exp. Mar. Biol. Ecol.* **474**, 116–125 (2016).
- 235 40. R. L. Geyer, G. R. Smith, J. E. Rettig, Effects of Roundup formulations, nutrient addition, and  
236 Western mosquitofish (*Gambusia affinis*) on aquatic communities. *Environ. Sci. Pollut. Res.* **23**,  
237 11729–11739 (2016).
- 238 41. G. K. Greer, M. A. Dietrich, J. M. Lincoln, *Ailanthus altissima* Stimulates legume nodulation in  
239 *Trifolium pratense* via root exudates: a novel mechanism facilitating invasion? *Int. J. Plant Sci.* **177**,  
240 400–408 (2016).
- 241 42. X. Lu, *et al.*, Warming benefits a native species competing with an invasive congener in the  
242 presence of a biocontrol beetle. *New Phytol.* **211**, 1371–1381 (2016).
- 243 43. S. Zhou, *et al.*, Tall grasses have an advantage over the invasive vine *Mikania micrantha*: Potential  
244 control agents. *Biochem. Syst. Ecol.* **65**, 238–244 (2016).
- 245 44. C. Alba, J. E. NeSmith, C. Fahey, C. Angelini, S. L. Flory, Methods to test the interactive effects of  
246 drought and plant invasion on ecosystem structure and function using complementary common  
247 garden and field experiments. *Ecol. Evol.* **7**, 1442–1452 (2017).
- 248 45. E. Brouwer, L. Denys, E. Lucassen, T. Onkelinx, Competitive strength of Australian swamp  
249 stonecrop (*Crassula helmsii*) invading moorland pools. *Aquat. Invasions* **12**, 321–331 (2017).
- 250 46. A. L. Concillio, T. R. Seastedt, J. B. Nippert, Changing edaphic conditions and exploitation of an  
251 expanded phenological niche allows for increased exotic (introduced) plant species dominance.  
252 *Plant Soil* **415**, 299–315 (2017).
- 253 47. F. Correa-Araneda, A. Basaguren, R. T. Abdala-Díaz, A. M. Tonin, L. Boyero, Resource-allocation  
254 tradeoffs in caddisflies facing multiple stressors. *Ecol. Evol.* **7**, 5103–5110 (2017).
- 255 48. X. Cui, *et al.*, Increased nitrogen input enhances *Kandelia obovata* seedling growth in the presence  
256 of invasive *Spartina alterniflora* in subtropical regions of China. *Biol. Lett.* **13**, 20160760 (2017).
- 257 49. C. B. Eller, R. S. Oliveira, Effects of nitrogen availability on the competitive interactions between an  
258 invasive and a native grass from Brazilian cerrado. *Plant Soil* **410**, 63–72 (2017).
- 259 50. E. H. Esch, D. Lipson, E. E. Cleland, Direct and indirect effects of shifting rainfall on soil microbial  
260 respiration and enzyme activity in a semi-arid system. *Plant Soil* **411**, 333–346 (2017).
- 261 51. N. Ferreira-Rodríguez, I. Pardo, The interactive effects of temperature, trophic status, and the  
262 presence of an exotic clam on the performance of a native freshwater mussel. *Hydrobiologia* **797**,  
263 171–182 (2017).
- 264 52. D. Früh, P. Haase, S. Stoll, Temperature drives asymmetric competition between alien and  
265 indigenous freshwater snail species, *Physa acuta* and *Physa fontinalis*. *Aquat. Sci.* **79**, 187–195  
266 (2017).
- 267 53. D. C. Fryxell, E. P. Palkovacs, Warming strengthens the ecological role of intraspecific variation in a  
268 predator. *Copeia* **105**, 523–532 (2017).
- 269 54. D. S. Green, *et al.*, Competitive interactions moderate the effects of elevated temperature and  
270 atmospheric CO<sub>2</sub> on the health and functioning of oysters. *Mar. Ecol. Prog. Ser.* **582**, 93–103  
271 (2017).
- 272 55. N. P. Hitt, E. L. Snook, D. L. Massie, Brook trout use of thermal refugia and foraging habitat  
273 influenced by brown trout. *Can. J. Fish. Aquat. Sci.* **74**, 406–418 (2017).
- 274 56. P. Luigi, C. Giulia, Eutrophication affects the resistance of fucoids to an introduced alga spread.  
275 *Mar. Environ. Res.* **129**, 189–194 (2017).
- 276 57. M. M. Meza-Lopez, E. Siemann, Nutrient enrichment increases plant biomass and exotic plant  
277 proportional cover independent of warming in freshwater wetland communities. *Plant Ecol.* **218**,  
278 835–842 (2017).

- 279 58. N. Polo-Cavia, L. Boyero, B. Martín-Beyer, L. A. Barmuta, J. Bosch, Joint effects of rising  
280 temperature and the presence of introduced predatory fish on montane amphibian populations.  
281 *Anim. Conserv.* **20**, 128–134 (2017).
- 282 59. Y. Shao, et al., Nitrogen deposition cancels out exotic earthworm effects on plant-feeding nematode  
283 communities. *J. Anim. Ecol.* **86**, 708–717 (2017).
- 284 60. W. G. Shivega, L. Aldrich-Wolfe, Native plants fare better against an introduced competitor with  
285 native microbes and lower nitrogen availability. *AoB Plants* **9**, plx004 (2017).
- 286 61. H. Wu, M. Ismail, J. Ding, Global warming increases the interspecific competitiveness of the  
287 invasive plant alligator weed, *Alternanthera philoxeroides*. *Sci. Total Environ.* **575**, 1415–1422  
288 (2017).
- 289 62. S. G. Yelenik, C. M. D'Antonio, E. August-Schmidt, The influence of soil resources and plant traits  
290 on invasion and restoration in a subtropical woodland. *Plant Ecol.* **218**, 1149–1161 (2017).
- 291 63. J. T. Brittain, A. L. Strecker, The interactive effect of multiple stressors on crustacean zooplankton  
292 communities in montane lakes. *Water Resour. Res.* **54**, 939–954 (2018).
- 293 64. A. Broadbent, C. J. Stevens, D. A. Peltzer, N. J. Ostle, K. H. Orwin, Belowground competition  
294 drives invasive plant impact on native species regardless of nitrogen availability. *Oecologia* **186**,  
295 577–587 (2018).
- 296 65. C. M. Bruschetti, M. Addino, T. Luppi, O. Iribarne, Effects of nutrient enrichment and grazing by an  
297 invasive filter feeder on phytoplankton biomass in a South West Atlantic coastal lagoon. *Biol.*  
298 *Invasions* **20**, 2245–2256 (2018).
- 299 66. P. Burraco, M. Iglesias-Carrasco, C. Cabido, I. Gomez-Mestre, Eucalypt leaf litter impairs growth  
300 and development of amphibian larvae, inhibits their antipredator responses and alters their  
301 physiology. *Conserv. Physiol.* **6**, coy066 (2018).
- 302 67. L. A. Cavieres, A. K. Sanhueza, G. Torres-Mellado, A. Casanova-Katny, Competition between  
303 native Antarctic vascular plants and invasive *Poa annua* changes with temperature and soil  
304 nitrogen availability. *Biol. Invasions* **20**, 1597–1610 (2018).
- 305 68. A. R. Dzialowski, et al., Antagonistic effects of invasive zebra mussels and nutrient enrichment on  
306 algal and rotifer biomass. *Aquat. Invasions* **13**, 463–472 (2018).
- 307 69. E. H. Esch, A. C. Ashbacher, C. W. Kopp, E. E. Cleland, Competition reverses the response of  
308 shrub seedling mortality and growth along a soil moisture gradient. *J. Ecol.* **106**, 2096–2108 (2018).
- 309 70. C. Fahey, C. Angelini, S. L. Flory, Grass invasion and drought interact to alter the diversity and  
310 structure of native plant communities. *Ecology* **99**, 2692–2702 (2018).
- 311 71. M. J. Faldyn, M. D. Hunter, B. D. Elder, Climate change and an invasive, tropical milkweed: An  
312 ecological trap for monarch butterflies. *Ecology* **99**, 1031–1038 (2018).
- 313 72. Y. Liu, et al., The effects of changes in water and nitrogen availability on alien plant invasion into a  
314 stand of a native grassland species. *Oecologia* **188**, 441–450 (2018).
- 315 73. J. E. NeSmith, C. Alba, S. L. Flory, Experimental drought and plant invasion additively suppress  
316 primary pine species of southeastern US forests. *For. Ecol. Manag.* **411**, 158–165 (2018).
- 317 74. K. Nurkse, J. Kotta, M. Rätsep, I. Kotta, R. Kreitsberg, Experimental evaluation of the effects of the  
318 novel predators, round goby and mud crab on benthic invertebrates in the Gulf of Riga, Baltic Sea.  
319 *J. Mar. Biolog. Assoc. U.K.* **98**, 25–31 (2018).
- 320 75. L. Pereda-Briones, F. Tomas, J. Terrados, Field transplantation of seagrass (*Posidonia oceanica*)  
321 seedlings: Effects of invasive algae and nutrients. *Mar. Pollut. Bull.* **134**, 160–165 (2018).
- 322 76. T.-J. Qin, Y.-T. Guan, M.-X. Zhang, H.-L. Li, F.-H. Yu, Sediment type and nitrogen deposition affect  
323 the relationship between *Alternanthera philoxeroides* and experimental wetland plant communities.  
324 *Mar. Freshw. Res.* **69**, 811–822 (2018).
- 325 77. S. R. Vye, J. T. Dick, M. C. Emmerson, N. E. Connor, Cumulative effects of an invasive species  
326 and nutrient enrichment on rock pool communities. *Mar. Ecol. Prog. Ser.* **594**, 39–50 (2018).
- 327 78. T. Afreen, H. Singh, Does change in precipitation magnitude affect the soil respiration response? A  
328 study on constructed invaded and uninvaded tropical grassland ecosystem. *Ecol. Indic.* **102**, 84–94  
329 (2019).

- 330 79. C. Alba, C. Fahey, S. L. Flory, Global change stressors alter resources and shift plant interactions  
331 from facilitation to competition over time. *Ecology* **100**, e02859 (2019).
- 332 80. F. Demann, K. M. Wegner, Infection by invasive parasites increases susceptibility of native hosts to  
333 secondary infection via modulation of cellular immunity. *J. Anim. Ecol.* **88**, 427–438 (2019).
- 334 81. G. D. Gufu, A. Manea, M. R. Leishman, Experimental evidence that CO<sub>2</sub> and nutrient enrichment  
335 do not mediate interactions between a native and an exotic free-floating macrophyte. *Hydrobiologia*  
336 **846**, 75–85 (2019).
- 337 82. Hernández, E. J. Questad, W. M. Meyer III, K. N. Suding, The effects of nitrogen deposition and  
338 invasion on litter fuel quality and decomposition in a *Stipa pulchra* grassland. *J. Arid Environ.* **162**,  
339 35–44 (2019).
- 340 83. P. Homet, *et al.*, Exploring interactive effects of climate change and exotic pathogens on *Quercus*  
341 *suber* performance: Damage caused by *Phytophthora cinnamomi* varies across contrasting  
342 scenarios of soil moisture. *Agric. For. Meteorol.* **276**, 107605 (2019).
- 343 84. C. MacNeil, Predatory impacts of the invasive ‘killer shrimp’ *Dikerogammarus villosus* on a resident  
344 amphipod and isopod (Crustacea: Malacostraca) are influenced by water quality and habitat type.  
345 *Hydrobiologia* **833**, 53–64 (2019).
- 346 85. J. E. Ortiz, A. M. Marcarelli, K. J. Juneau, C. J. Huckins, Invasive *Myriophyllum spicatum* and  
347 nutrients interact to influence algal assemblages. *Aquat. Bot.* **156**, 1–9 (2019).
- 348 86. L. Pereda-Briones, J. Terrados, F. Tomas, Negative effects of warming on seagrass seedlings are  
349 not exacerbated by invasive algae. *Mar. Pollut. Bull.* **141**, 36–45 (2019).
- 350 87. S. Pérez Castro, E. E. Cleland, R. Wagner, R. Al Sawad, D. A. Lipson, Soil microbial responses to  
351 drought and exotic plants shift carbon metabolism. *The ISME journal* **13**, 1776–1787 (2019).
- 352 88. C. Fahey, A. Koyama, P. M. Antunes, K. Dunfield, S. L. Flory, Plant communities mediate the  
353 interactive effects of invasion and drought on soil microbial communities. *ISME J.* **14**, 1396–1409  
354 (2020).
- 355 89. M. Garbowski, C. S. Brown, D. B. Johnston, Soil amendment interacts with invasive grass and  
356 drought to uniquely influence aboveground versus belowground biomass in aridland restoration.  
357 *Restor. Ecol.* **28**, A13–A23 (2020).
- 358 90. X. Guo, *et al.*, Increased soil moisture aggravated the competitive effects of the invasive tree *Rhus*  
359 *typhina* on the native tree *Cotinus coggygia*. *BMC Ecol.* **20**, 1–13 (2020).
- 360 91. M. L. LaForgia, S. P. Harrison, A. M. Latimer, Invasive species interact with climatic variability to  
361 reduce success of natives. *Ecology* **101**, e03022 (2020).
- 362 92. S. Qiu, *et al.*, Changes in multiple environmental factors additively enhance the dominance of an  
363 exotic plant with a novel trade-off pattern. *J. Ecol.* **108**, 1989–1999 (2020).
- 364 93. B. M. Sokame, *et al.*, Influence of temperature on the interaction for resource utilization between  
365 Fall Armyworm, *Spodoptera frugiperda* (Lepidoptera: Noctuidae), and a community of lepidopteran  
366 maize stemborers larvae. *Insects* **11**, 73 (2020).
- 367 94. V. M. Vetter, *et al.*, Invader presence disrupts the stabilizing effect of species richness in plant  
368 community recovery after drought. *Glob. Change Biol.* **26**, 3539–3551 (2020).
- 369 95. R. Vieira, A. Martin, A. H. Engelen, M. S. Thomsen, F. Arenas, Interactive effects of co-occurring  
370 anthropogenic stressors on the seagrass, *Zostera noltei*. *Ecol. Indic.* **109**, 105780 (2020).
- 371 96. M. Borenstein, H. Cooper, L. Hedges, J. Valentine, “Effect sizes for continuous data”. in *The*  
372 *handbook of research synthesis and meta-analysis*, 2<sup>nd</sup> edition, H. Cooper, L. V. Hedges, J. C.  
373 Valentine, Eds. (Russell Sage Foundation, 2009), pp. 221–235.
- 374 97. J. Koricheva, J. Gurevitch, K. Mengersen, *Handbook of meta-analysis in ecology and evolution*  
375 (Princeton University Press, 2013).
- 376 98. L. V. Hedges, Estimation of effect size from a series of independent experiments. *Psychol. Bull.* **92**,  
377 490 (1982).
- 378 99. E. A. Hamman, P. Pappalardo, J. R. Bence, S. D. Peacor, C. W. Osenberg, Bias in meta-analyses  
379 using Hedges’ *d*. *Ecosphere* **9**, e02419 (2018).
- 380 100. M. C. Jackson, C. J. Loewen, R. D. Vinebrooke, C. T. Chimimba, Net effects of multiple stressors  
381 in freshwater ecosystems: A meta-analysis. *Glob. Change Biol.* **22**, 180–189 (2016).



Supplementary Information

- 382 101. A. Gelman, D. B. Rubin, Inference from iterative simulation using multiple sequences. *Stat. Sci.* **7**,  
383 457–472 (1992).  
384 102. S. Nakagawa, E. S. Santos, Methodological issues and advances in biological meta-analysis.  
385 *Evol. Ecol.* **26**, 1253–1274 (2012).

386

387 **Figures and tables**

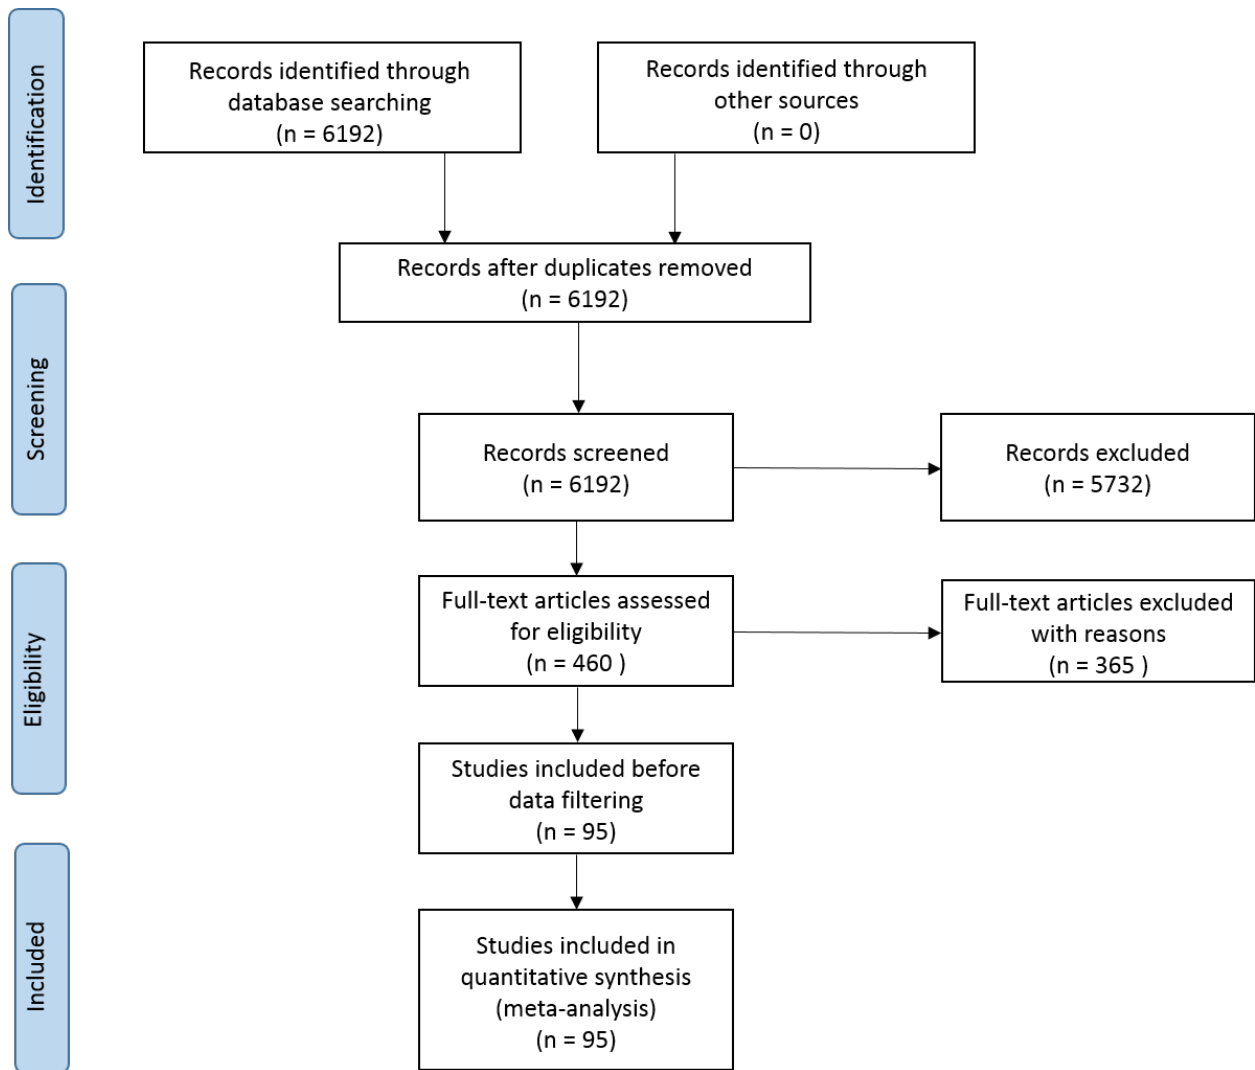

388

389 **Fig. S1.1.** Diagram showing the steps we used to filter studies from the database search to use in  
 390 analysis and the number of studies excluded and retained at each step.

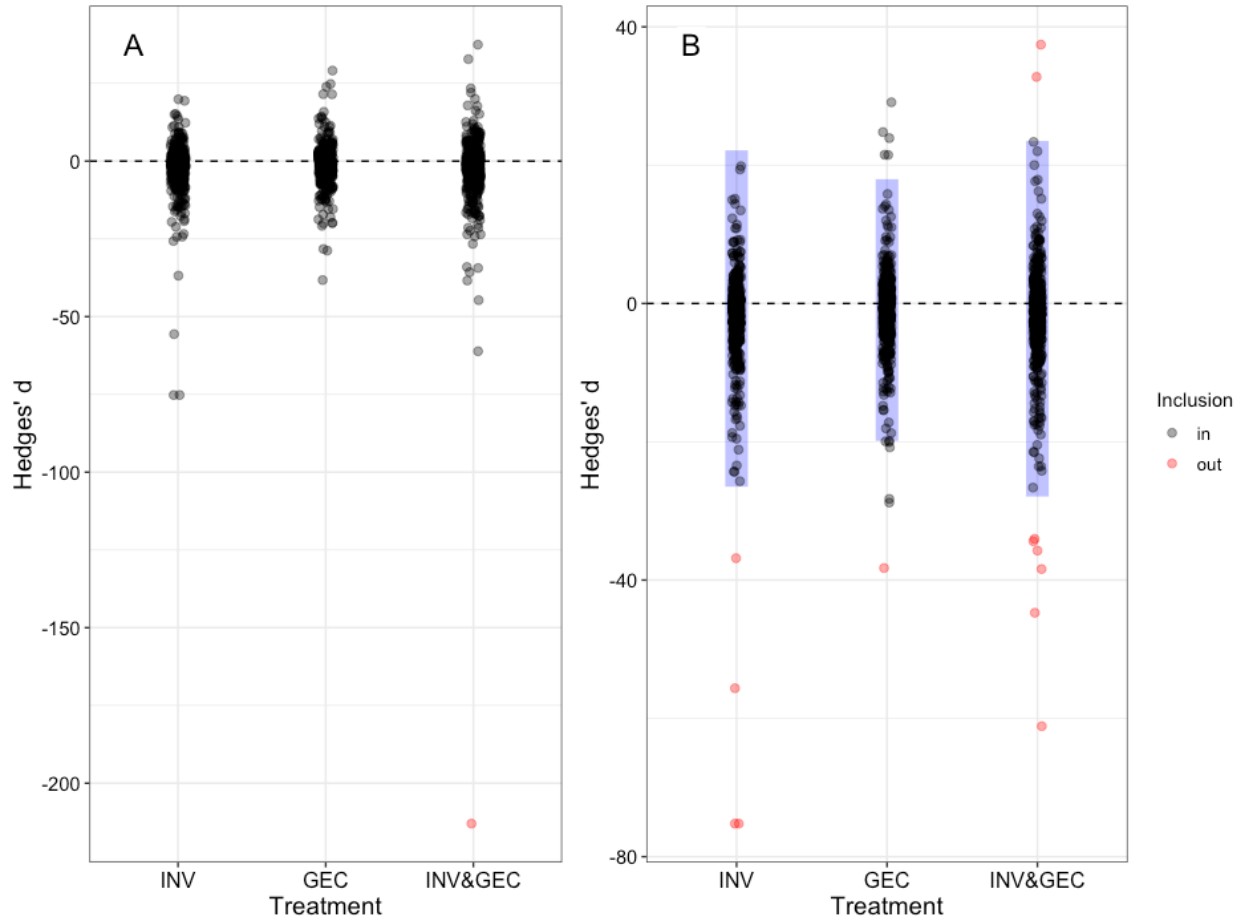

391

392 **Figure S1.2.** Visual assessment of Hedges' *d* distributions and outliers. We removed one case with a  
 393 Hedges' *d* value < -200 (A), in addition to eight cases with NA or infinite Hedges' *d* values, from the  
 394 dataset prior to analysis (shown in red). To examine the effect of potential outliers on results, we  
 395 performed a secondary analysis on a dataset clipped to exclude cases with Hedges' *d* values with an  
 396 absolute value of 30 or higher (B; excluded points shown in red). This cutoff was chosen based on visual  
 397 examination of outliers and because this value approximated three standard deviations around the mean  
 398 of each treatment (z-scores, shown as blue shaded areas in B; see **Table S1.3**).

399

400

401 **Table S1.1.** Full search terms used in Web of Science to find papers focusing on invasions and one or  
 402 more global environmental change (GEC) factors.

| GEC type                 | Full search term                                                                                                                                                                                                                                                                                                                            |
|--------------------------|---------------------------------------------------------------------------------------------------------------------------------------------------------------------------------------------------------------------------------------------------------------------------------------------------------------------------------------------|
| Warming                  | TS=((Invasi* OR invader* OR exotic* OR alien* OR non-native* OR nonnative* OR non-indigenous OR nonindigenous OR naturalized OR introduc*) AND (Impact* OR effect*) AND (Experim* OR manipula*) AND (Warm* OR heat* Or thermal OR temperature increase OR temperature manipulation* OR climate change experiment))                          |
| Nitrogen deposition      | TS=((Invasi* OR invader* OR exotic* OR alien* OR non-native* OR nonnative* OR non-indigenous OR nonindigenous OR naturalized OR introduc*) AND (Impact* OR effect*) AND (Experim* OR manipula*) AND (Nitrogen AND (deposition OR fertili* OR add* OR suppl* OR enrich* OR enahnc* OR applic* OR input*)))                                   |
| O <sub>2</sub> depletion | TS=((Invasi* OR invader* OR exotic* OR alien* OR non-native* OR nonnative* OR non-indigenous OR nonindigenous OR naturalized OR introduc*) AND (Impact* OR effect*) AND (Experim* OR manipula*) AND (eutroph* OR hypoxia OR oxygen OR anoxi* OR oxygen deplet* OR O2 deplet*))                                                              |
| Drought                  | TS=((Invasi* OR invader* OR exotic* OR alien* OR non-native* OR nonnative* OR non-indigenous OR nonindigenous OR naturalized OR introduc*) AND (Impact* OR effect*) AND (Experim* OR manipula*) AND (Drought OR water stress* OR rainout OR rain out OR rain-out OR precipitation exclusion* OR rain exclusion* OR precipitation removal*)) |
| CO <sub>2</sub> addition | TS=((Invasi* OR invader* OR exotic* OR alien* OR non-native* OR nonnative* OR non-indigenous OR nonindigenous OR naturalized OR introduc*) AND (Impact* OR effect*) AND (Experim* OR manipula*) AND ((CO2 OR carbon dioxide) AND (increase* OR enhance* OR enrich* OR elev*)))                                                              |
| Altered pH               | TS=((Invasi* OR invader* OR exotic* OR alien* OR non-native* OR nonnative* OR non-indigenous OR nonindigenous OR naturalized OR introduc*) AND (Impact* OR effect*) AND (Experim* OR manipula*) AND (pH))                                                                                                                                   |

403

404

405 **Table S1.2.** Definitions and ecological scales of response class categories used as predictors in meta-  
 406 analysis.

| Response class | Definition                                                                                                                 | Scale                         |
|----------------|----------------------------------------------------------------------------------------------------------------------------|-------------------------------|
| Abundance      | Number or density of individuals                                                                                           | Species, community            |
| Allocation     | Carbon or size allocation to different tissues (e.g., specific leaf area, height:width ratio)                              | Species, community            |
| Behavior       | Individual activity, such as aggressive or feeding behaviors                                                               | Species                       |
| Biomass        | Mass of individuals or populations, including proxy measures such as chlorophyll a concentration in freshwater systems     | Species, community            |
| Diversity      | Biodiversity (e.g., species richness, evenness)                                                                            | Community                     |
| Physiology     | Metabolic or immune processes or related enzyme activity                                                                   | Species                       |
| Nutrient       | Nutrient concentrations in tissues, nutrient or other resource availability, or ecosystem-level carbon or nutrient cycling | Species, community, ecosystem |
| Reproduction   | Reproductive output or development of reproductive tissues (e.g., flowers)                                                 | Species, community            |
| Size           | Body size, limb/body part size, or growth                                                                                  | Species, community            |
| Survival       | Survivorship or mortality rate                                                                                             | Species, community            |

407

408

409 **Table S1.3.** Means, standard deviations, and z-scores of Hedges' *d* values for each treatment (excluding  
 410 values greater than 200 or less than -200).

| Treatment | Mean +/- SD    | Z-score bounds |
|-----------|----------------|----------------|
| Invasion  | -2.18 +/- 8.10 | (-22.14—26.49) |
| GEC       | -0.95 +/- 6.31 | (-17.97—19.86) |
| INV&GEC   | -2.21 +/- 8.57 | (-23.49—27.92) |

411

412 **Appendix part 2: Supplementary results**  
 413

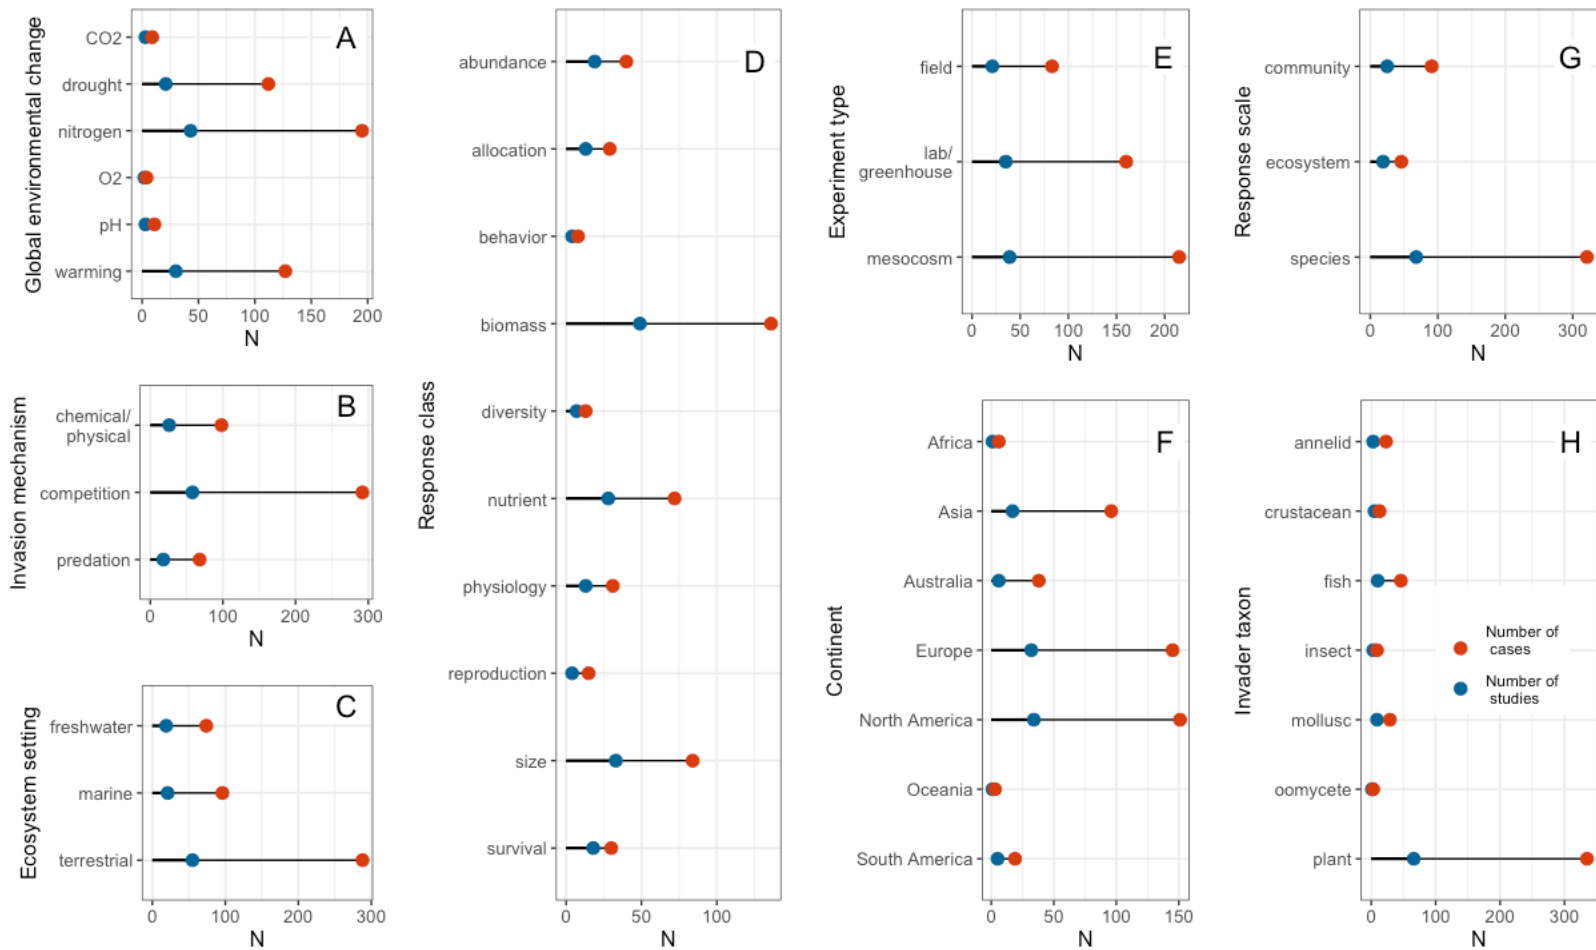

414  
 415 **Figure S2.1.** Numbers of cases and studies in each category in the dataset used for analysis (total  $n_{cases} = 458$ ,  $n_{studies} = 95$ ). Most studies  
 416 contributed multiple cases because they measured multiple responses, focused on multiple species, or examined multiple global environmental  
 417 changes.

418

Supplementary Information

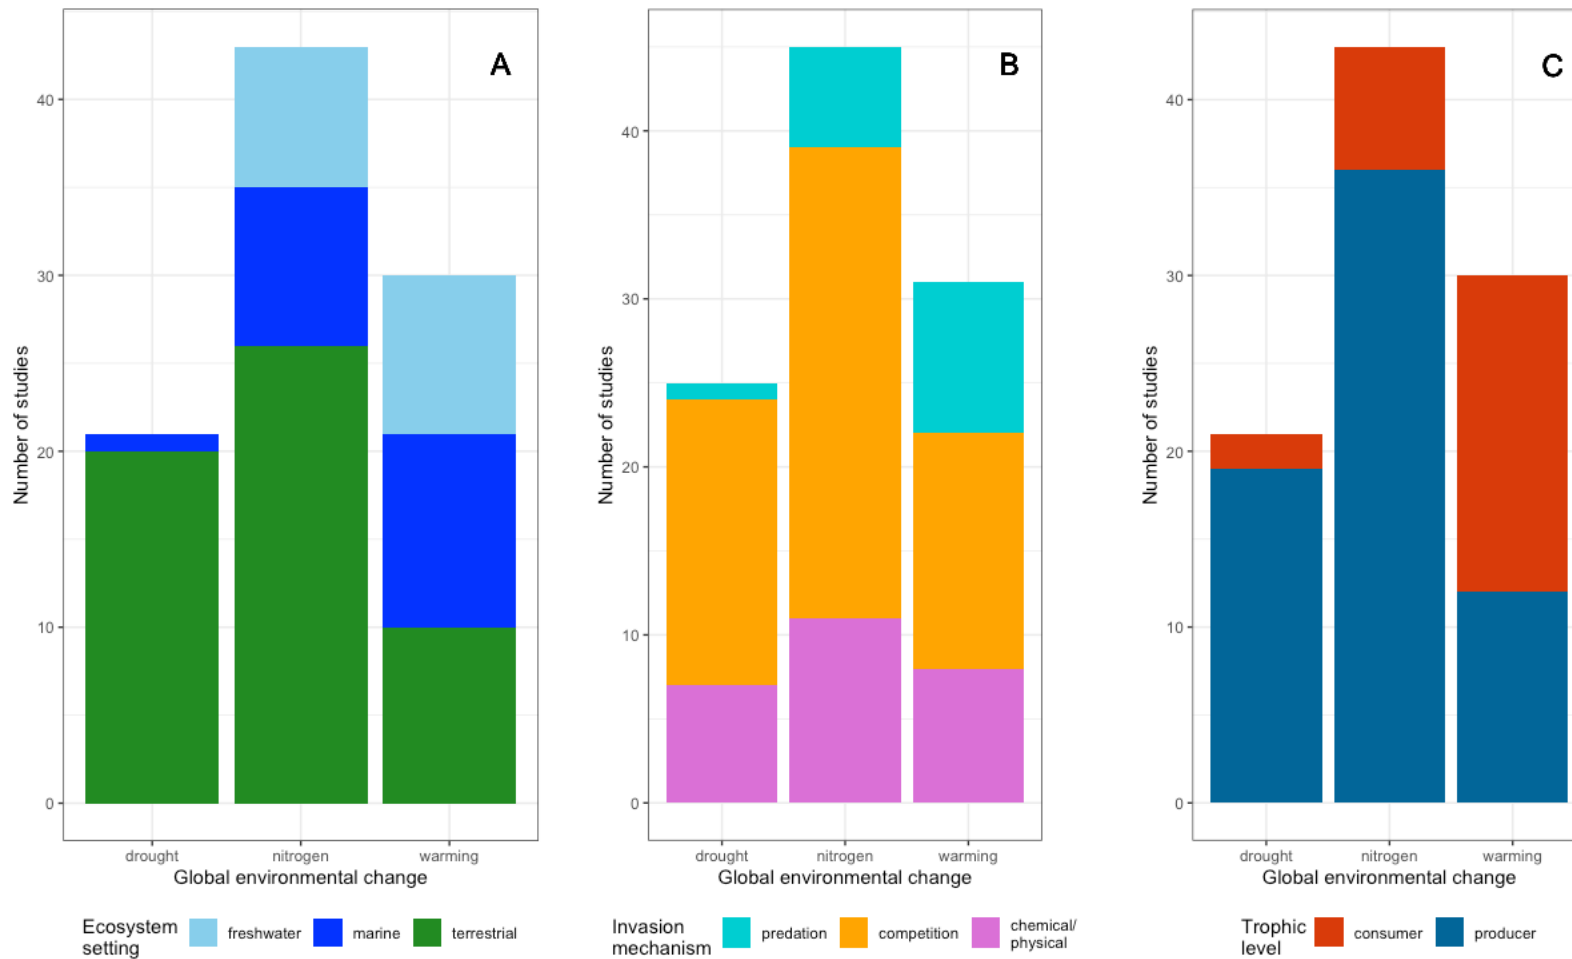

419

420 **Figure S2.2.** Relationships between global environmental change (GEC) type and ecosystem setting (A), invasion mechanism (B), and trophic  
 421 level of invasive species (C) across studies in the dataset used for analysis. Note that a single study could have multiple invasive species, but  
 422 each study only occurred in one ecosystem setting.

Supplementary Information

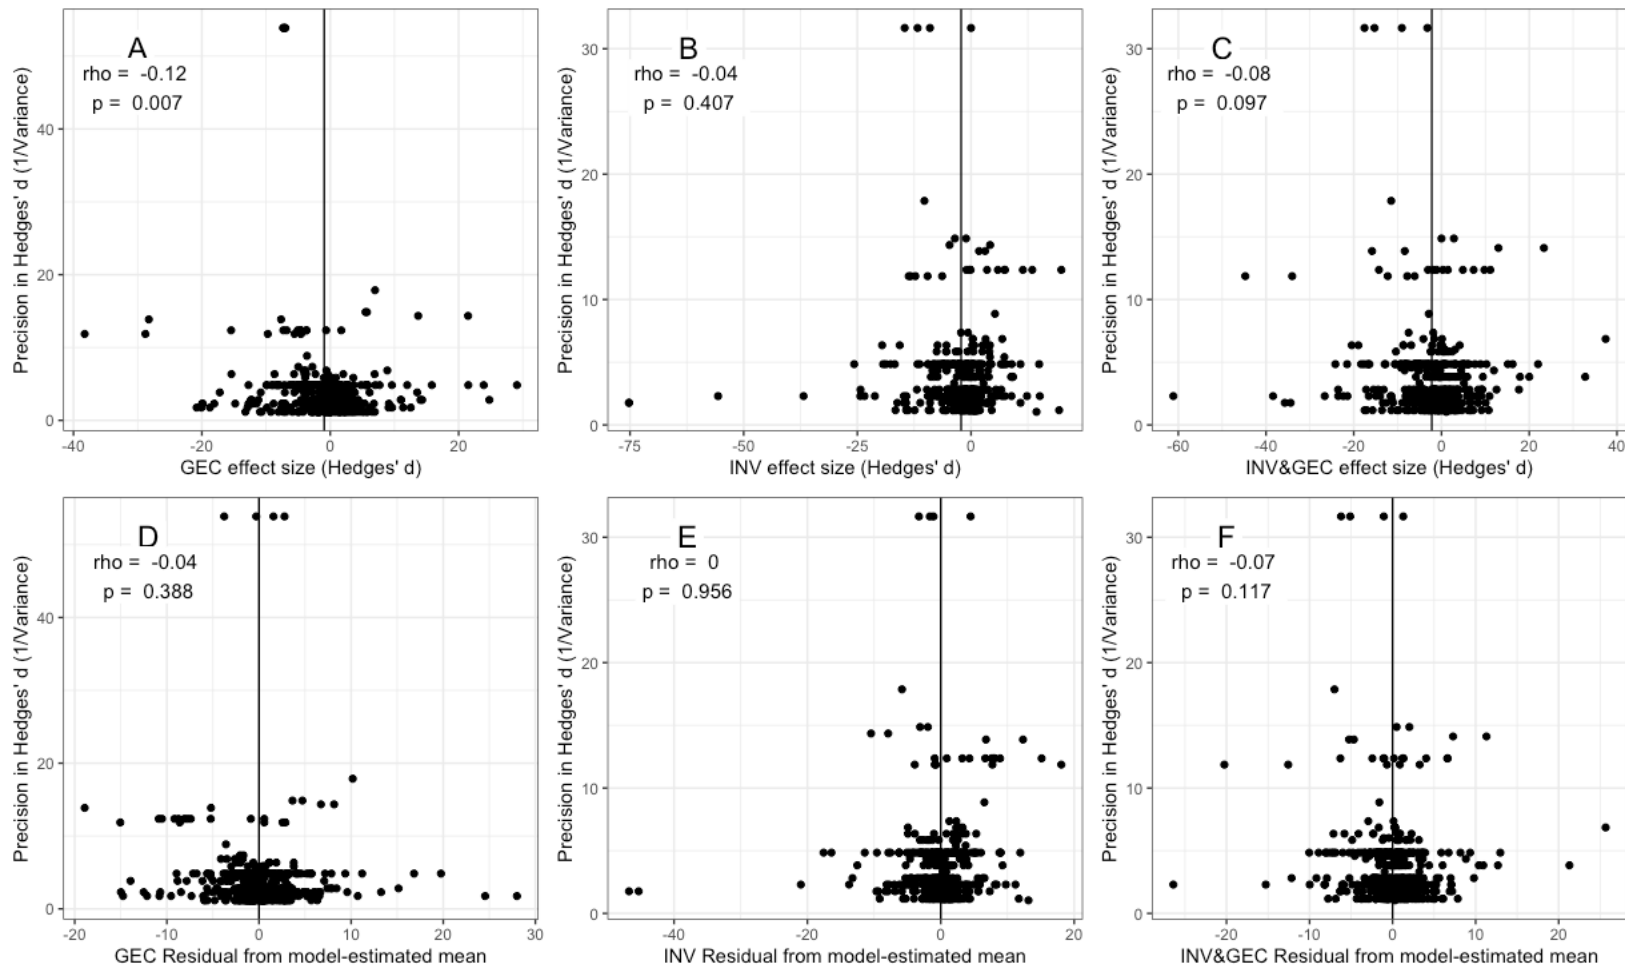

423

424 **Figure S2.3.** Funnel plots examining potential publication bias in the dataset used for analysis, comparing the precision in Hedges' *d* values to: 1)  
 425 the Hedge's *d* values (top row) and 2) the residuals of the mixed effects model estimating the means of each treatment (bottom row). Results of  
 426 Spearman's rank correlation tests are shown in the top right corner of each panel. There was some evidence of publication bias in the data (A-C),  
 427 particularly for global environmental change (GEC) treatments (A), with more negative Hedges' *d* values in studies with high precision and high  
 428 sample sizes. However, accounting for differences in studies with random effects largely removed this trend (D-F).



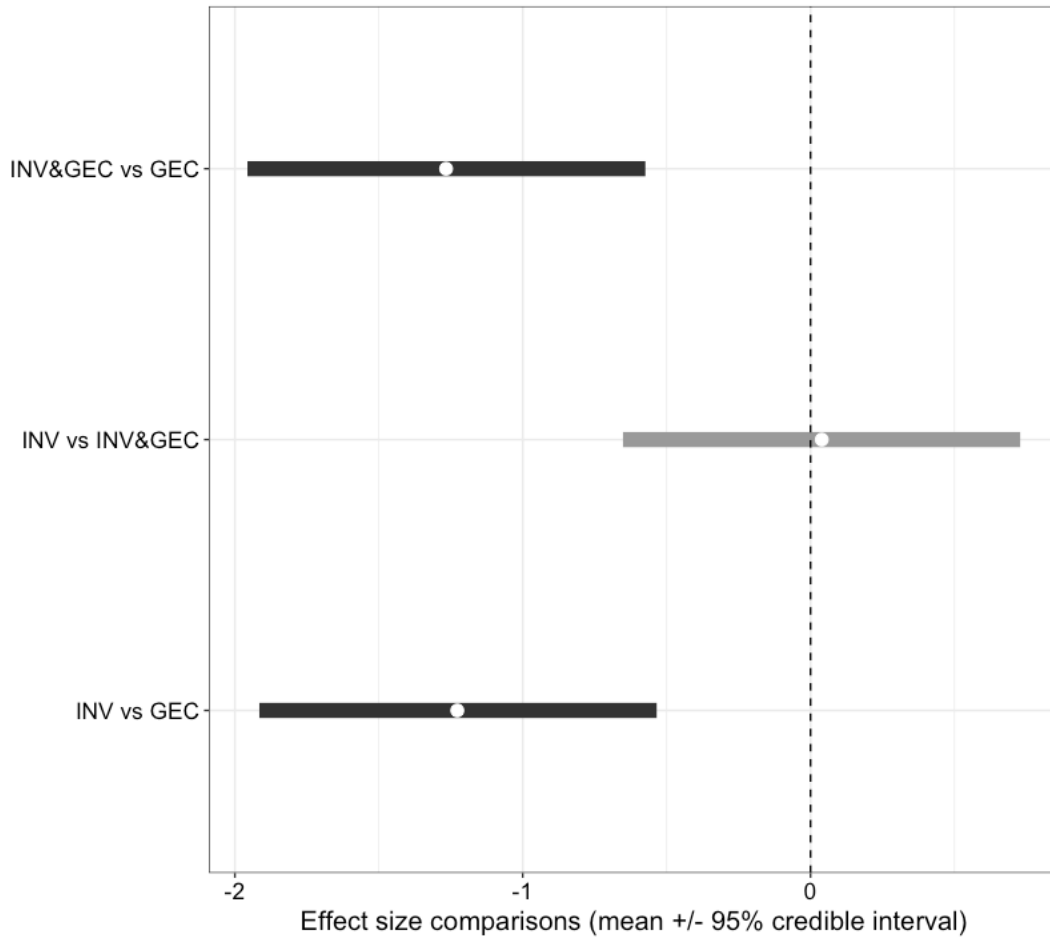

429

430 **Figure S2.4.** Invasion (INV) and combined invasion and global environmental change (INV&GEC) effects  
 431 were both significantly more negative than GEC effects across all cases and studies. Bars represent the  
 432 differences between the estimated mean Hedges'  $d$ 's of the GEC, invasion, and INV&GEC treatments  
 433 estimated from a Bayesian mixed-effect model, with white circles showing the mean and grey bars  
 434 showing the 95% credible interval of the posterior distribution. Credible intervals that do not cross the  
 435 zero line (dark grey bars) are considered significantly different from zero.

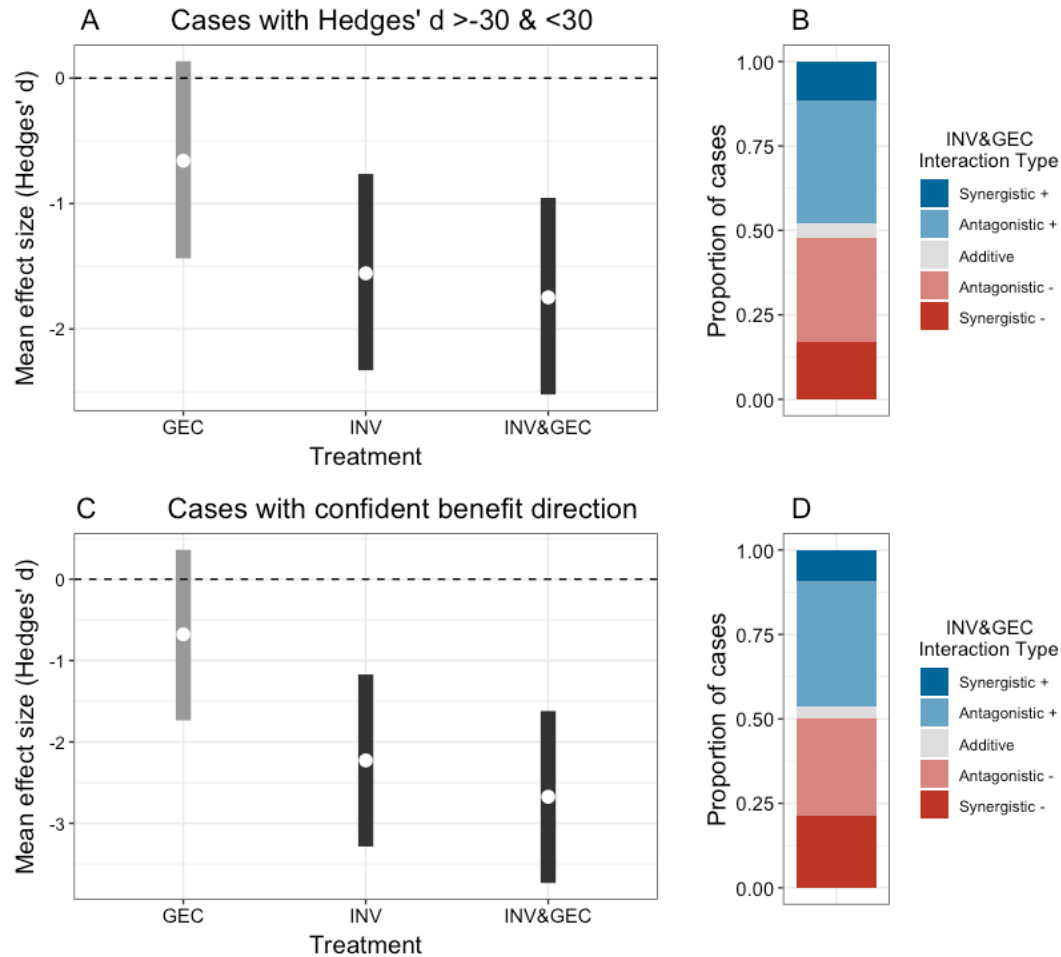

436

437 **Figure S2.5.** Results comparing treatment mean effect sizes and the distributions of combined stressor  
 438 (INV&GEC) interaction types were robust to treatment of outliers (top row) and assessment of whether a  
 439 higher value of a measured response was considered beneficial or detrimental to the ecosystem (bottom  
 440 row). We re-ran analyses with subsets of the data with mean effect sizes ranging from -30 to 30  
 441 (compared to -200 to 200 in the main analysis; see SI part 2;  $n_{\text{cases}} = 450$ ,  $n_{\text{studies}} = 95$ ) and with only  
 442 cases with responses for which we were able to confidently assess whether a higher value indicated a  
 443 beneficial or detrimental outcome ( $n_{\text{cases}} = 310$ ,  $n_{\text{studies}} = 78$ ). Results are similar to those reported in the  
 444 main text (**Fig. 2**). Mean effect sizes (Hedges'  $d$ ) of invasion (INV) and INV&GEC treatments were more  
 445 negative than global environmental change (GEC) treatments (A, C; white circles show the mean and  
 446 grey bars show the 95% credible interval of the posterior distribution for each treatment mean).  
 447 Antagonistic interactions were most common, and synergistic interactions were mostly more negative  
 448 than expected from the individual stressor effects ("Synergistic (-)"; B, D).

449

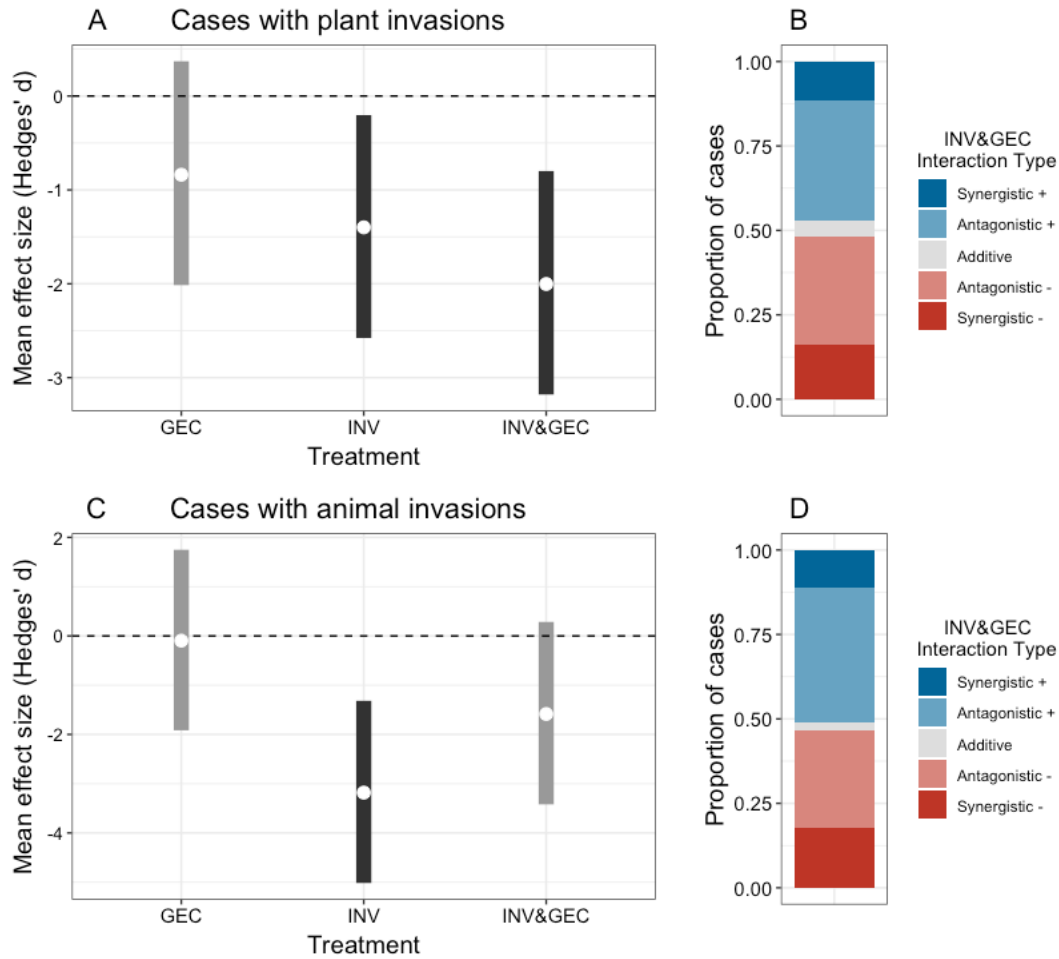

450

451 **Figure S2.6.** Mean effect sizes and the distribution of combined stressor (INV&GEC) interaction types  
 452 were somewhat similar between studies of plant (top row) and animal (bottom row) invasive species. In  
 453 studies of both plant and animal invasions, mean effect sizes (Hedges' *d*) of invasion (INV) and INV&GEC  
 454 treatments were more negative than global environmental change (GEC) treatments (A, C; white circles  
 455 show the mean and grey bars show the 95% credible interval of the posterior distribution for each  
 456 treatment mean). Antagonistic interactions were most common, and synergistic interactions were mostly  
 457 more negative than expected from the individual stressor effects ("Synergistic (-)"; B, D) in studies of both  
 458 plant and animal invasions. Most studies focused on plant invasions ( $n_{\text{cases}} = 335$ ,  $n_{\text{studies}} = 66$ ), and the  
 459 overall trends described in the main text are similar to those of plant studies. Animal invasion studies  
 460 were less common ( $n_{\text{cases}} = 120$ ,  $n_{\text{studies}} = 28$ ) but showed similar trends.

461

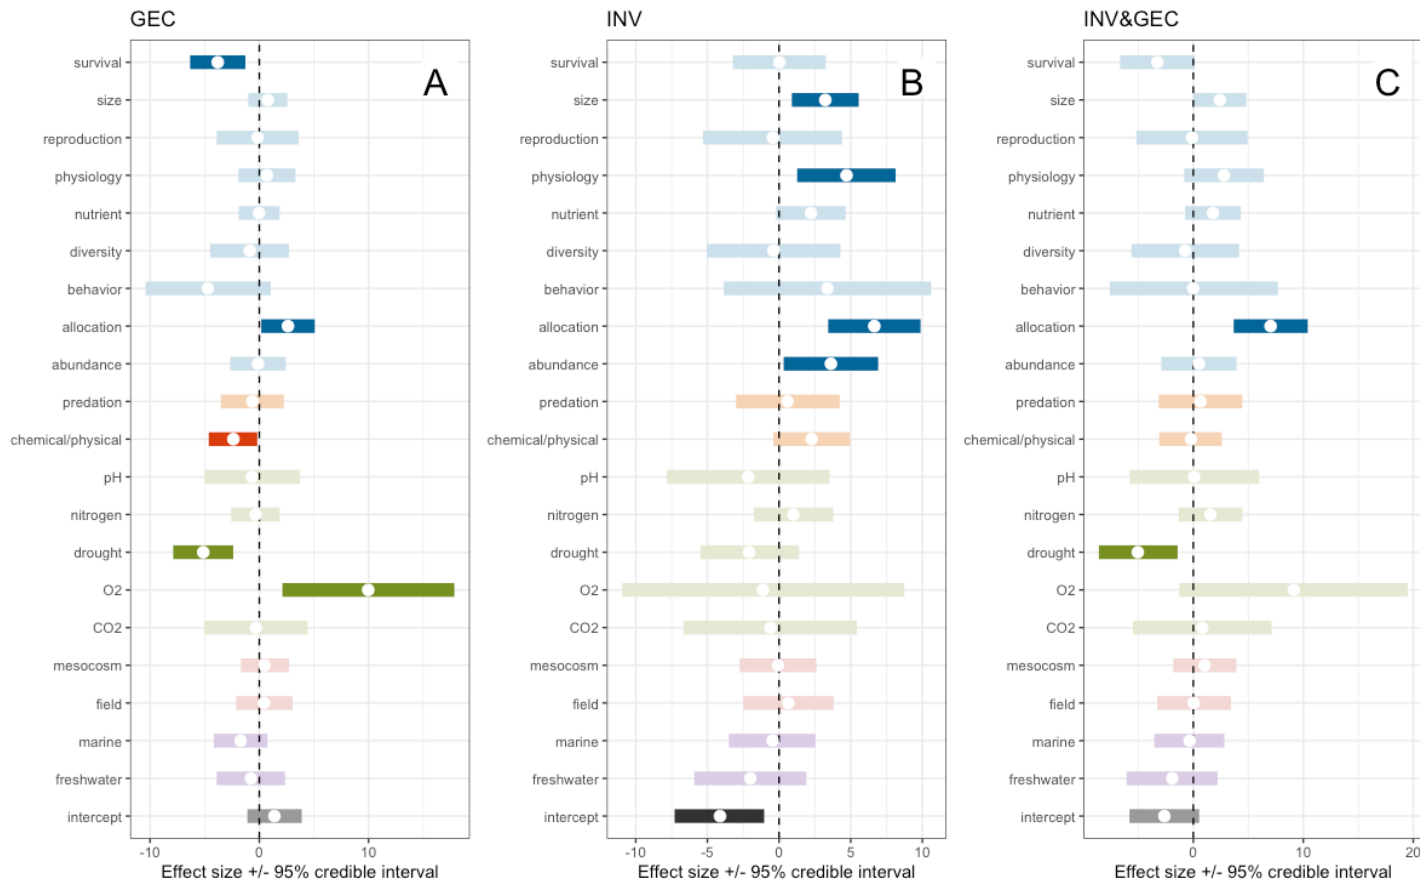

462

463 **Figure S2.7.** Results of full mixed-effect models predicting Hedges' *d*'s of each treatment. Effects are considered non-significant if 95% credible  
 464 intervals cross zero (shown in lighter colors). Bars are color-coded by predictor variable (purple = ecosystem setting, red = experiment type, green  
 465 = global environmental change factor, orange = invasion mechanism, blue = response class). Intercepts represent warming studies with  
 466 competitive invasions in a terrestrial lab/greenhouse experiment and cases where the measured response was biomass. Invasion (INV) effects  
 467 were generally negative across categories (i.e., without significant differences from the negative intercept) except for significantly less detrimental  
 468 effects on abundance, allocation, body size, and physiology. Global environmental change (GEC) and combined (INV&GEC) effects were more  
 469 negative with drought and on tissue allocation. GEC effects were less detrimental with depleted O<sub>2</sub> ( $n_{\text{studies}} = 2$ ) and more detrimental in studies  
 470 with invasions acting via chemical/physical mechanisms.

Supplementary Information

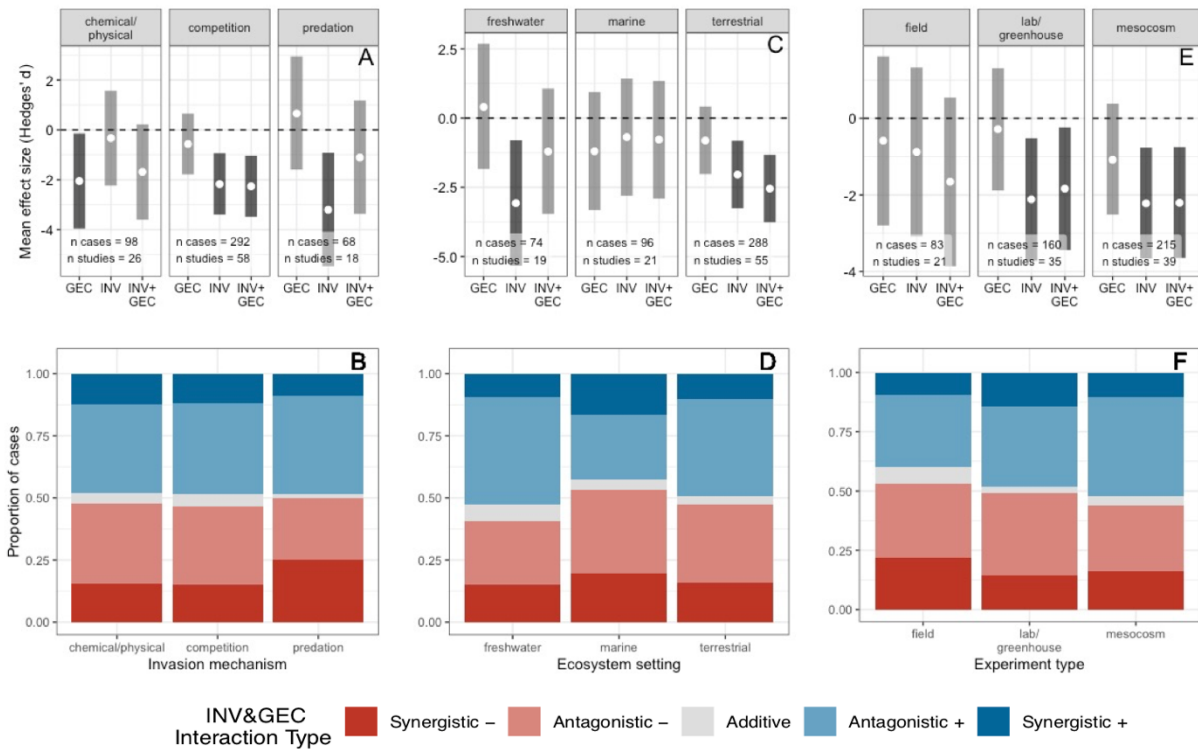

471

472 **Figure S2.8.** Mean effect sizes (Hedges' *d*) of invasion (INV), global environmental change (GEC) and  
 473 combined (INV&GEC) treatments (top) and distributions of INV&GEC interaction types (bottom) across  
 474 invasion mechanisms (A-B), ecosystem settings (C-D), and experiment types (E-F). White circles show  
 475 the mean and grey bars show the 95% credible interval of the posterior distribution for the mean effect  
 476 size for each GEC type (A, C, E). Credible intervals that do not cross the zero line (dark grey bars) are  
 477 considered significantly different from zero. Invasion and INV&GEC effects were negative, on average, in  
 478 terrestrial systems, with competitive invaders, and in lab/greenhouse studies and mesocosm studies.  
 479 Invasion effects were also negative, on average, with invasive species acting via predation and in  
 480 freshwater systems. However, none of these effects were significant when controlling for other variation  
 481 across cases (see **Fig. S2.7**). GEC effects tended to be negative with invasive species acting via  
 482 chemical/physical impacts, perhaps because most of these studies focused on terrestrial plants (**Fig.**  
 483 **S2.2**). There was no difference in the distributions of interaction types across any of these predictors (B,  
 484 D, F).

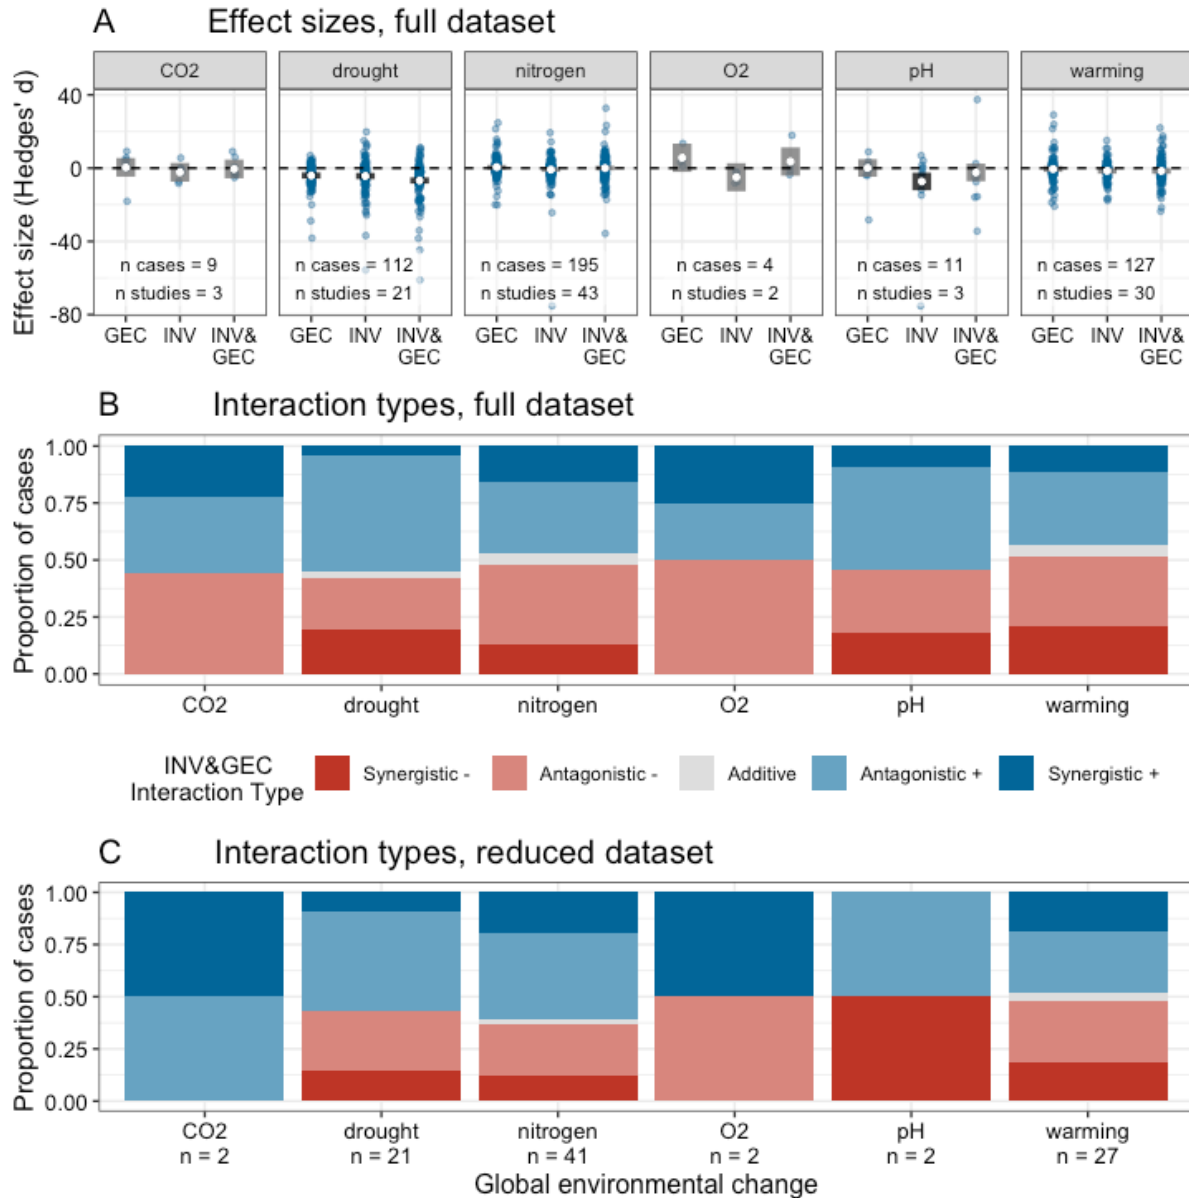

485

486 **Figure S2.9.** Effect sizes (Hedges'  $d$ ) of invasion (INV), global environmental change (GEC) and  
487 combined (INV&GEC) treatments (A) and distributions of INV&GEC interaction types within the full  
488 dataset used for analysis (B) and the dataset reduced to one case per study (C) across global  
489 environmental change (GEC) types. (A) Colored points represent calculated Hedges'  $d$ 's from individual  
490 cases. White circles show the mean and grey bars show the 95% credible interval of the posterior  
491 distribution for the mean effect size for each GEC type. Credible intervals that do not cross the zero line  
492 (dark grey bars) are considered significantly different from zero. (B) INV&GEC interaction types varied  
493 across GECs (simulated  $p$ -value = 0.017) in the full dataset (see panel A for sample sizes). (C) There  
494 were no differences in INV&GEC interaction types across GECs in the reduced dataset with only one  
495 case per study (simulated  $p$ -value = 0.916).

Supplementary Information

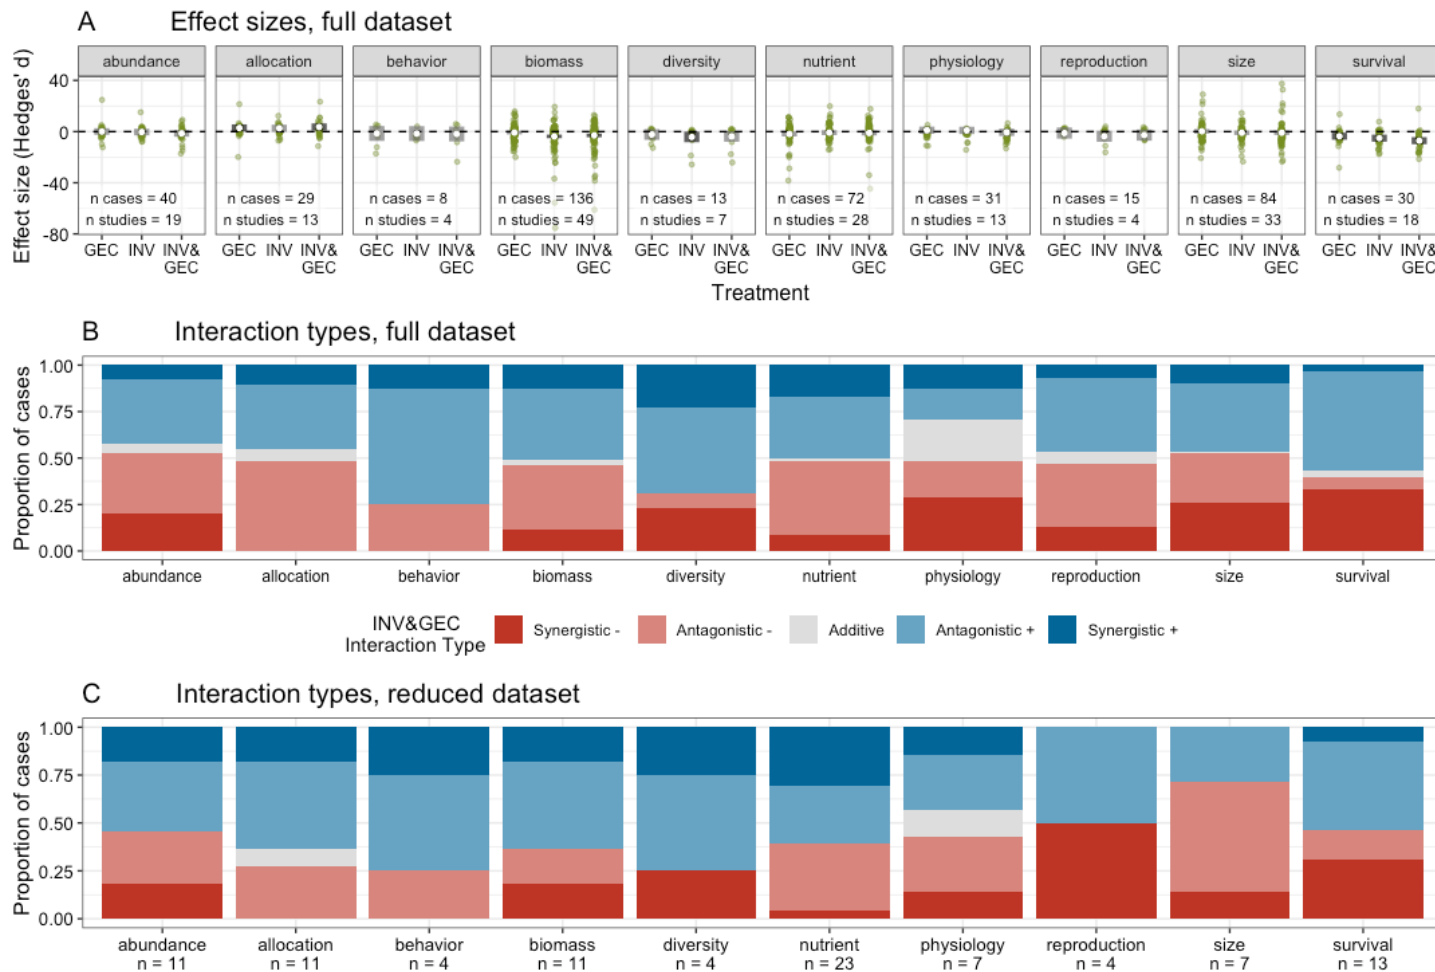

496

497 **Figure S2.10.** Effect sizes (Hedges'  $d$ ) of invasion (INV), global environmental change (GEC) and combined (INV&GEC) treatments (A) and  
 498 distributions of INV&GEC interaction types within the full dataset used for analysis (B) and the dataset reduced to one case per study (C) across  
 499 response classes. (A) Colored points represent calculated Hedges'  $d$ 's from individual cases. White circles show the mean and grey bars show the  
 500 95% credible interval of the posterior distribution for the mean effect size for each response class. Credible intervals that do not cross the zero line  
 501 (dark grey bars) are considered significantly different from zero. (B) INV&GEC interaction types varied across response classes (simulated p-value  
 502 = 0.001) in the full dataset (see panel A for sample sizes). (C) There were no differences in INV&GEC interaction types across response classes in  
 503 the reduced dataset of one case per study (simulated p-value = 0.680).
